# Supplementary material
Source: publisher site journal article supplement (doi:10.18632/aging.203486)
Supplement: Supplementary file 1 [file aging-v13-203486-supplementary-material-SD1.pdf]

## SUPPLEMENTARY FIGURE

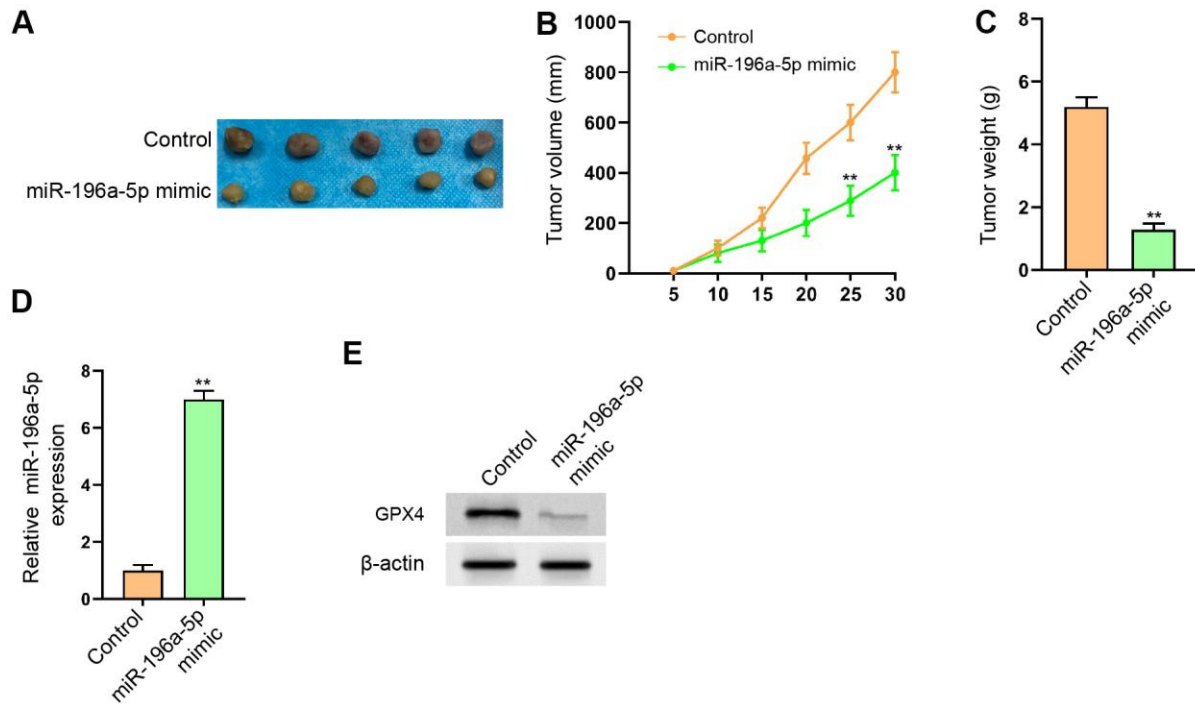

**Supplementary Figure 1. MiR-196a-5p represses tumor growth of osteosarcoma *in vivo*.** (A–E) Tumorigenicity assay in the nude mice ( $n = 5$ ) analyzed the tumor growth of U2OS cells treated with miR-196a-5p mimic. The tumor images (A), tumor volume (B), and weight (C) were presented. (D) The qPCR detected miR-196a-5p expression in the tumor tissues. (E) Western blot analysis determined GPX4 expression in the tumor tissues. \*\*  $P < 0.01$ .
